# Supplementary material for: Association of macular pigment optical density with retinal layer thicknesses in eyes with and without manifest primary open-angle glaucoma
Source: HighWire-hosted journal article supplement (doi:10.1136/bmjophth-2023-001331), 2023-10-01

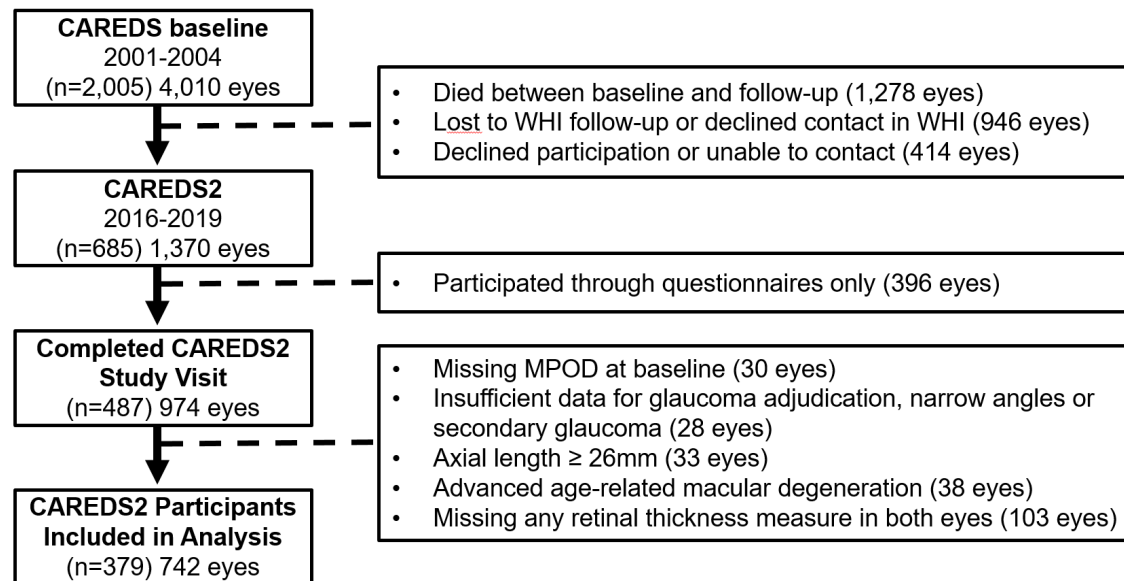

Supplement: bmjophth-2023-001331supp001_data_supplement.pdf [file bmjophth-2023-001331supp001_data_supplement.pdf]
