# Supplementary material for: Association of macular pigment optical density with retinal layer thicknesses in eyes with and without manifest primary open-angle glaucoma
Source: HighWire-hosted journal article supplement (doi:10.1136/bmjophth-2023-001331), 2023-10-01
Supplement: bmjophth-2023-001331supp003_data_supplement.pdf [file bmjophth-2023-001331supp003_data_supplement.pdf]

**Supplementary Table S1. Characteristics of CAREDS participants included and excluded in the analysis (N=2,005)**

| Characteristics*                                                | All CAREDS participants (n = 2005) | Included (n = 379) | Excluded (n = 1,626) | p-value |
|-----------------------------------------------------------------|------------------------------------|--------------------|----------------------|---------|
| Age (years) - CAREDS baseline                                   | 69.7±0.2                           | 65.4±0.3           | 70.7±0.2             | < .001  |
| Race/Ethnicity                                                  |                                    |                    |                      | .84     |
| Native American                                                 | 0.0%                               | 0.0%               | 0.1%                 |         |
| Asian                                                           | 0.7%                               | 0.9%               | 0.7%                 |         |
| Native Hawaiian/Pacific Islander                                | 0.0%                               | 0.0%               | 0.1%                 |         |
| Black                                                           | 1.0%                               | 1.5%               | 1.1%                 |         |
| White                                                           | 97.1%                              | 97.0%              | 96.7%                |         |
| More than one race                                              | 0.8%                               | 0.4%               | 1.0%                 |         |
| Unknown/not reported                                            | 0.3%                               | 0.1%               | 0.4%                 |         |
| Ethnicity                                                       |                                    |                    |                      | .93     |
| Non-Hispanic                                                    | 99.5%                              | 98.6%              | 99.4%                |         |
| Hispanic                                                        | 0.4%                               | 1.4%               | 0.4%                 |         |
| Unknown                                                         | 0.1%                               | 0.0%               | 0.1%                 |         |
| Education                                                       |                                    |                    |                      | < .001  |
| High school graduate or less                                    | 22.1%                              | 13.9%              | 24.0%                |         |
| College graduate                                                | 47.8%                              | 48.4%              | 47.8%                |         |
| Post-college education                                          | 30.0%                              | 37.7%              | 28.1%                |         |
| Self-reported annual household income ≥ \$75,000 - WHI baseline | 17.2%                              | 24.8%              | 15.3%                | < .001  |
| Pack years smoked - CAREDS baseline                             |                                    |                    |                      | .15     |
| Never smoker                                                    | 58.3%                              | 62.4%              | 57.8%                |         |
| < 7 pack years                                                  | 22.3%                              | 24.0%              | 22.3%                |         |
| ≥ 7 pack years                                                  | 19.4%                              | 13.6%              | 19.9%                |         |
| Intraocular lens – CAREDS baseline                              | 16.0%                              | 11.0%              | 16.6%                | .04     |
| Waist circumference (inches) - CAREDS baseline                  | 34.71±0.12                         | 33.9±0.3           | 34.9±0.1             | .003    |
| Body mass index (kg/m <sup>2</sup> ) - CAREDS baseline          | 28.0±0.1                           | 27.1±0.3           | 28.2±0.1             | .001    |
| Self-reported hypertension – CAREDS baseline                    | 28.2%                              | 28.9%              | 29.0%                | .18     |
| Self-reported diabetes - CAREDS baseline                        | 7.1%                               | 4.2%               | 7.8%                 | .02     |
| Self-reported glaucoma - CAREDS baseline                        | 6.1%                               | 4.2%               | 6.4%                 | .32     |
| MPOD - CAREDS baseline (ODU) <sup>†</sup>                       | 0.36±0.01                          | 0.38±0.01          | 0.36±0.01            | .08     |

\*Values are as mean ± SE for continuous variables and percentages for categorical variables.

<sup>†</sup>Data presented from the right eye only

Abbreviations: CAREDS - Carotenoids in Age-Related Eye Disease Study; WHI - Women's Health Initiative; ODU – optical density units

Supplementary Table S2. Participant characteristics by manifest POAG status at CAREDS2 (N=379)

| Characteristics*                          | No Manifest POAG (n = 347) | Manifest POAG (n = 32) | p-value |
|-------------------------------------------|----------------------------|------------------------|---------|
| Age (years)                               | 65.2±0.3                   | 67.8±1.0               | .01     |
| Race                                      |                            |                        | .53     |
| Asian                                     | 0.6%                       | 1.9%                   |         |
| Black                                     | 0.6%                       | 5.0%                   |         |
| White                                     | 98.2%                      | 93.1%                  |         |
| More than one race                        | 0.3%                       | 0.0%                   |         |
| Unknown/not reported                      | 0.3%                       | 0.0%                   |         |
| Ethnicity                                 |                            |                        | .99     |
| Non-Hispanic                              | 99.4%                      | 100.0%                 |         |
| Hispanic                                  | 0.6%                       | 0.0%                   |         |
| Education                                 |                            |                        | .93     |
| High school graduate or less              | 13.5%                      | 5.8%                   |         |
| College or vocational training            | 46.9%                      | 57.8%                  |         |
| Post college                              | 39.6%                      | 36.4%                  |         |
| Household Income                          |                            |                        | .74     |
| < \$75,000                                | 72.3%                      | 72.2%                  |         |
| > \$75,000                                | 27.7%                      | 27.8%                  |         |
| Pack years smoked                         |                            |                        | .03     |
| Non-smoker                                | 56.9%                      | 74.1%                  |         |
| < 7 pack years                            | 24.2%                      | 25.9%                  |         |
| ≥ 7 pack years                            | 18.9%                      | 0.0%                   |         |
| Intraocular lens implantation*            | 5.7%                       | 18.6%                  | .03     |
| Intraocular pressure (mmHg)*              | 14.4±0.2                   | 14.7±0.6               | .58     |
| Axial length (mm)*                        | 23.6±0.1                   | 23.8±0.2               | .22     |
| Corneal thickness (µm)*                   | 558.5±1.9                  | 554.5±6.5              | .55     |
| Waist circumference (in.)                 | 34.1±0.3                   | 33.6±0.9               | .63     |
| Body mass index (kg/m <sup>2</sup> )      | 27.5±0.3                   | 26.8±0.9               | .44     |
| Self-reported hypertension                | 21.2%                      | 28.3%                  | .74     |
| Self-reported diabetes                    | 3.8%                       | 1.9%                   | .76     |
| Cup to disc ratio ≥ 0.6 – CAREDS baseline | 2.5%                       | 20.9%                  | < .001  |
| MPOD – CAREDS baseline (ODU)†             | 0.39±0.01                  | 0.31±0.04              | .03     |

\*Values for ocular characteristics are shown only for the right eye, except for cup to disc ratio ≥ 0.6 at CAREDS baseline, which refers to whether this characteristic was present in at least one eye

† Data presented from the right eye only

Abbreviations: CAREDS - Carotenoids in Age-Related Eye Disease Study; MPOD - macular pigment optical density; POAG – primary open-angle glaucoma; SE – standard error

**Supplementary Table S3. Retinal layer thickness\* by quartile of macular pigment optical density (MPOD) at CAREDS baseline among eyes without manifest POAG, excluding participants using lutein and zeaxanthin supplements ( $\geq 1$  mg/day) prior to CAREDS2 (N = 302)**

| Retinal layer thickness*<br>( $\mu\text{m}$ , mean $\pm$ SE) | Number of Eyes | MPOD – CAREDS baseline, 0.5°<br>(optical density units) |                           |                           |                           | $\beta \pm$ SE<br>(1-SD increase) | P-trend |
|--------------------------------------------------------------|----------------|---------------------------------------------------------|---------------------------|---------------------------|---------------------------|-----------------------------------|---------|
|                                                              |                | Quartile 1<br>(0.00-0.23)                               | Quartile 2<br>(0.23-0.38) | Quartile 3<br>(0.38-0.51) | Quartile 4<br>(0.51-1.00) |                                   |         |
| <b>Peripapillary RNFL</b>                                    |                |                                                         |                           |                           |                           |                                   |         |
| Average                                                      | 535            | 94.2 $\pm$ 1.0                                          | 93.8 $\pm$ 1.1            | 93.1 $\pm$ 1.1            | 93.9 $\pm$ 1.0            | -0.2 $\pm$ 0.5                    | .64     |
| Inferior                                                     | 535            | 121.2 $\pm$ 1.5                                         | 121.8 $\pm$ 1.7           | 120.7 $\pm$ 1.8           | 121.4 $\pm$ 1.6           | -0.2 $\pm$ 0.8                    | .83     |
| Superior                                                     | 535            | 111.7 $\pm$ 1.6                                         | 111.2 $\pm$ 1.6           | 110.0 $\pm$ 1.6           | 113.1 $\pm$ 1.5           | 0.5 $\pm$ 0.8                     | .55     |
| Nasal                                                        | 535            | 72.6 $\pm$ 1.3                                          | 72.5 $\pm$ 1.3            | 70.7 $\pm$ 1.3            | 72.1 $\pm$ 1.2            | -0.5 $\pm$ 0.7                    | .42     |
| Temporal                                                     | 535            | 71.3 $\pm$ 1.3                                          | 69.9 $\pm$ 1.5            | 71.0 $\pm$ 1.2            | 68.8 $\pm$ 1.3            | -0.7 $\pm$ 0.7                    | .27     |
| <b>Macular RNFL</b>                                          |                |                                                         |                           |                           |                           |                                   |         |
| Central                                                      | 566            | 13.1 $\pm$ 0.3                                          | 12.7 $\pm$ 0.2            | 13.0 $\pm$ 0.2            | 13.7 $\pm$ 0.3            | 0.2 $\pm$ 0.1                     | .12     |
| Inner                                                        | 566            | 23.7 $\pm$ 0.3                                          | 23.1 $\pm$ 0.3            | 23.6 $\pm$ 0.3            | 23.5 $\pm$ 0.3            | 0.0 $\pm$ 0.1                     | .71     |
| Outer                                                        | 564            | 40.0 $\pm$ 0.6                                          | 38.5 $\pm$ 0.6            | 39.7 $\pm$ 0.6            | 39.3 $\pm$ 0.6            | -0.1 $\pm$ 0.3                    | .68     |
| <b>Macular GCL</b>                                           |                |                                                         |                           |                           |                           |                                   |         |
| Central                                                      | 565            | 15.4 $\pm$ 0.5                                          | 15.0 $\pm$ 0.4            | 16.1 $\pm$ 0.4            | 17.1 $\pm$ 0.4            | 0.6 $\pm$ 0.2                     | .004    |
| Inner                                                        | 566            | 46.1 $\pm$ 0.5                                          | 45.7 $\pm$ 0.6            | 46.2 $\pm$ 0.5            | 46.7 $\pm$ 0.5            | 0.3 $\pm$ 0.3                     | .27     |
| Outer                                                        | 564            | 30.3 $\pm$ 0.3                                          | 30.2 $\pm$ 0.3            | 30.5 $\pm$ 0.4            | 30.3 $\pm$ 0.3            | 0.1 $\pm$ 0.2                     | .52     |
| <b>Macular IPL</b>                                           |                |                                                         |                           |                           |                           |                                   |         |
| Central                                                      | 567            | 20.7 $\pm$ 0.4                                          | 20.4 $\pm$ 0.3            | 21.4 $\pm$ 0.3            | 22.5 $\pm$ 0.4            | 0.7 $\pm$ 0.2                     | < .001  |
| Inner                                                        | 567            | 38.0 $\pm$ 0.3                                          | 37.9 $\pm$ 0.4            | 38.1 $\pm$ 0.3            | 38.6 $\pm$ 0.3            | 0.3 $\pm$ 0.1                     | .07     |
| Outer                                                        | 566            | 25.5 $\pm$ 0.2                                          | 25.6 $\pm$ 0.2            | 25.6 $\pm$ 0.2            | 25.8 $\pm$ 0.2            | 0.2 $\pm$ 0.1                     | .16     |
| <b>Macular GCC</b>                                           |                |                                                         |                           |                           |                           |                                   |         |
| Central                                                      | 555            | 48.5 $\pm$ 1.0                                          | 47.6 $\pm$ 0.9            | 50.3 $\pm$ 0.9            | 53.0 $\pm$ 1.1            | 1.7 $\pm$ 0.5                     | .001    |
| Inner                                                        | 556            | 107.5 $\pm$ 0.9                                         | 106.5 $\pm$ 1.1           | 107.8 $\pm$ 1.0           | 108.7 $\pm$ 0.9           | 0.6 $\pm$ 0.5                     | .23     |
| Outer                                                        | 555            | 95.4 $\pm$ 0.9                                          | 94.2 $\pm$ 1.0            | 95.8 $\pm$ 1.1            | 95.4 $\pm$ 0.9            | 0.2 $\pm$ 0.5                     | .65     |

\*Adjusted for age and axial length

Abbreviations: CAREDS - Carotenoids in Age-Related Eye Disease Study; GCC - ganglion cell complex; GCL - ganglion cell layer; IPL - inner-plexiform layer; RNFL - retinal nerve fiber layer; SE - standard error; SD – standard deviation

**Supplementary Table S4. Retinal layer thickness\* by quartile of macular pigment density (MPOD) at CAREDS baseline among eyes with manifest POAG, excluding participants using lutein and zeaxanthin supplements ( $\geq 1$  mg/day) prior to CAREDS2 (N = 25)**

| Retinal layer thickness*<br>( $\mu\text{m}$ , mean $\pm$ SE) | Number of Eyes | MPOD – CAREDS baseline, 0.5°<br>(optical density units) |                           |                           |                           | $\beta \pm$ SE<br>(1-SD increase) | P-trend |
|--------------------------------------------------------------|----------------|---------------------------------------------------------|---------------------------|---------------------------|---------------------------|-----------------------------------|---------|
|                                                              |                | Quartile 1<br>(0.00-0.07)                               | Quartile 2<br>(0.08-0.30) | Quartile 3<br>(0.32-0.48) | Quartile 4<br>(0.48-0.81) |                                   |         |
| <b>Peripapillary RNFL</b>                                    |                |                                                         |                           |                           |                           |                                   |         |
| Average                                                      | 33             | 64.8 $\pm$ 3.9                                          | 74.0 $\pm$ 2.2            | 74.2 $\pm$ 3.5            | 75.9 $\pm$ 2.0            | 3.3 $\pm$ 1.5                     | .03     |
| Inferior                                                     | 33             | 74.7 $\pm$ 6.5                                          | 90.7 $\pm$ 5.2            | 83.9 $\pm$ 5.8            | 75.3 $\pm$ 4.9            | -0.1 $\pm$ 2.8                    | .98     |
| Superior                                                     | 33             | 72.1 $\pm$ 4.0                                          | 81.5 $\pm$ 2.8            | 94.3 $\pm$ 5.3            | 93.5 $\pm$ 3.8            | 7.0 $\pm$ 2.4                     | .004    |
| Nasal                                                        | 33             | 56.8 $\pm$ 3.3                                          | 58.2 $\pm$ 3.4            | 57.0 $\pm$ 6.7            | 61.8 $\pm$ 2.6            | 1.4 $\pm$ 1.6                     | .40     |
| Temporal                                                     | 33             | 56.0 $\pm$ 2.7                                          | 65.8 $\pm$ 2.4            | 61.1 $\pm$ 2.4            | 73.2 $\pm$ 3.5            | 5.0 $\pm$ 1.5                     | .001    |
| <b>Macular RNFL</b>                                          |                |                                                         |                           |                           |                           |                                   |         |
| Central                                                      | 37             | 11.4 $\pm$ 0.8                                          | 13.4 $\pm$ 0.9            | 9.8 $\pm$ 1.1             | 13.1 $\pm$ 0.8            | 0.4 $\pm$ 0.5                     | .38     |
| Inner                                                        | 37             | 21.1 $\pm$ 0.7                                          | 24.5 $\pm$ 0.9            | 22.4 $\pm$ 0.7            | 22.8 $\pm$ 0.6            | 0.5 $\pm$ 0.4                     | .20     |
| Outer                                                        | 37             | 29.6 $\pm$ 2.2                                          | 38.0 $\pm$ 1.8            | 31.7 $\pm$ 2.2            | 32.2 $\pm$ 1.6            | 0.2 $\pm$ 1.1                     | .84     |
| <b>Macular GCL</b>                                           |                |                                                         |                           |                           |                           |                                   |         |
| Central                                                      | 37             | 12.8 $\pm$ 0.9                                          | 16.9 $\pm$ 1.7            | 12.2 $\pm$ 1.8            | 17.2 $\pm$ 0.7            | 1.2 $\pm$ 0.6                     | .03     |
| Inner                                                        | 37             | 35.2 $\pm$ 2.0                                          | 43.9 $\pm$ 1.8            | 40.1 $\pm$ 1.9            | 39.0 $\pm$ 2.7            | 0.9 $\pm$ 1.2                     | .44     |
| Outer                                                        | 37             | 25.6 $\pm$ 0.8                                          | 27.3 $\pm$ 0.9            | 26.8 $\pm$ 0.7            | 25.2 $\pm$ 0.8            | -0.2 $\pm$ 0.4                    | .56     |
| <b>Macular IPL</b>                                           |                |                                                         |                           |                           |                           |                                   |         |
| Central                                                      | 37             | 18.2 $\pm$ 0.7                                          | 23.9 $\pm$ 2.5            | 17.4 $\pm$ 1.3            | 21.5 $\pm$ 1.5            | 1.0 $\pm$ 0.6                     | .09     |
| Inner                                                        | 37             | 31.3 $\pm$ 1.1                                          | 38.2 $\pm$ 1.5            | 33.8 $\pm$ 1.0            | 33.6 $\pm$ 1.7            | 0.4 $\pm$ 0.7                     | .53     |
| Outer                                                        | 37             | 22.4 $\pm$ 0.5                                          | 23.9 $\pm$ 0.6            | 22.9 $\pm$ 0.5            | 22.4 $\pm$ 0.6            | -0.2 $\pm$ 0.3                    | .45     |
| <b>Macular GCC</b>                                           |                |                                                         |                           |                           |                           |                                   |         |
| Central                                                      | 36             | 42.2 $\pm$ 2.1                                          | 51.7 $\pm$ 3.7            | 39.6 $\pm$ 4.3            | 52.3 $\pm$ 2.5            | 2.7 $\pm$ 1.5                     | .07     |
| Inner                                                        | 36             | 87.6 $\pm$ 3.4                                          | 105.4 $\pm$ 3.3           | 96.3 $\pm$ 3.4            | 96.6 $\pm$ 4.6            | 2.2 $\pm$ 2.1                     | .30     |
| Outer                                                        | 36             | 77.6 $\pm$ 3.0                                          | 89.2 $\pm$ 2.8            | 81.3 $\pm$ 3.1            | 80.0 $\pm$ 2.6            | -0.2 $\pm$ 1.6                    | .90     |

\*Adjusted for age and axial length

Abbreviations: CAREDS - Carotenoids in Age-Related Eye Disease Study; GCC - ganglion cell complex; GCL - ganglion cell layer; IPL - inner-plexiform layer; RNFL - retinal nerve fiber layer; SE - standard error; SD – standard deviation
